# Supplementary material for: Preparation of 2-deoxy-2-C-p-tolylsulfonyl-β-d-glucopyranosyl p-tolyl sulfones having non-chair conformation and their elimination reactions
Source: Royal Society of Chemistry journal article supplement (doi:10.1039/b707802a), 2007-01-01
Supplement: b707802aa.pdf [file b707802aa.pdf]

**Preparation of 2-deoxy-2-*C-p*-tolylsulfonyl- $\beta$ -D-glucopyranosyl *p*-tolylsulfones having non-chair conformation and their elimination reactions**

Tohru Sakakibara\*, Tomomi Suganuma, and Yasuhiro Kajihara  
*Graduate School of Integrated Science, Yokohama City University, 22-2, Seto, Kanazawa-ku, Yokohama 236-0027, Japan. Fax: +81-45-787-2413; Tel: +81-45-787-2183; E-mail: baratoru@yokohama-cu.ac.jp*

$^1\text{H}$  NMR and  $^{13}\text{C}$  NMR data of all new compounds measured by Bruker Advance 400 (in  $\text{CDCl}_3$ , otherwise cited) were assigned by  $^1\text{H}$  NMR, COSY, NOESY,  $^{13}\text{C}$  NMR, HMQC, and HMBC. Example spectra of **6** and **7** were separately enclosed.

Compound **3**;  $\delta_{\text{H}}$  6.16(1H, d,  $J_{1,2}$  3.5, H-1), 3.52(1H, dd, H-2), 5.52(1H, dd,  $J_{2,3}$  11.1,  $J_{3,4}$  9.4, H-3), 5.08(1H, dd,  $J_{4,5}$  9.7, H-4), 4.37(1H, ddd,  $J_{5,6}$  4.1,  $J_{5,6'}$  1.9, H-5), 4.33(1H, dd,  $J_{6,6'}$  12.4, H-6), 4.08(1H, dd, H-6'), 2.34(3H, s,  $\text{SPhCH}_3$ ), 2.07(3H, s,  $\text{OCOCH}_3$ ), 2.04(3H, s,  $\text{OCOCH}_3$ ), 1.96(3H, s,  $\text{OCOCH}_3$ );  $\delta_{\text{C}}$  170.45(OCOMe), 169.80(OCOMe), 169.63 (OCOMe), 94.07(C-1), 56.28(C-2), 71.30(C-3), 68.63 (C-4), 70.97(C-5), 61.31(C-6), 21.06( $\text{SPhCH}_3$ ), 20.64 ( $\text{OCOCH}_3$ ), 20.60 ( $\text{OCOCH}_3$ ), 20.56 ( $\text{OCOCH}_3$ ).

Compound **4**;  $\delta_{\text{H}}$  4.43(1H, d,  $J_{1,2}$  10.5, H-1), 2.71(1H, dd, H-2), 3.40(1H, ddd,  $J_{2,3}$  10.2,  $J_{3,\text{OH-3}}$  1.7, H-3), 3.56(1H, ddd,  $J_{3,4}$  8.7,  $J_{4,5}$  9.4,  $J_{4,\text{OH-4}}$  2.3, H-4), 3.19(1H, ddd, H-5), 3.83(1H, ddd,  $J_{5,6}$  3.5,  $J_{6,6'}$  11.9,  $J_{6,\text{OH-6}}$  6.7, H-6), 3.71(1H, ddd,  $J_{5,6'}$  5.8,  $J_{6',\text{OH-6}}$  6.4, H-6'), 3.20(1H, d, OH-3 at 3 position), 2.69(1H, d, OH-4), 2.36(3H, s,  $\text{SPhCH}_3$ ), 2.33 (3H, s,  $\text{SPhCH}_3$ ), 1.95(1H, t, OH-6);  $\delta_{\text{C}}$  86.50(C-1), 55.02(C-2), 74.46(C-3), 71.64(C-4), 78.74(C-5), 62.68(C-6), 21.20( $\text{SPhCH}_3$ ), 21.13 ( $\text{SPhCH}_3$ ).

Compound **5**;  $\delta_{\text{H}}$  5.15(1H, d,  $J_{1,2}$  4.3, H-1), 4.11(1H, dd,  $J_{2,3}$  5.9, H-2), 4.30(1H, dt,  $J_{3,4}$  7.6,  $J_{3,\text{OH}}$  5.9, H-3), 4.02(1H, dd,  $J_{4,5}$  9.7,  $J_{4,\text{OH}}$  4.3, H-4), 3.67(1H, dt,  $J_{5,6} = J_{5,6'}$  3.8, H-5), 3.80(2H, bd, H-6, -6'), 3.58(1H, d, 3-OH), 2.98 (1H, d, 4-OH), 1.92 (1H, bs, 6-OH), 2.45(3H, s,  $\text{SO}_2\text{PhCH}_3$ ), 2.30(3H, s,  $\text{SO}_2\text{PhCH}_3$ );  $\delta_{\text{C}}$  87.88(C-1), 65.44(C-2), 69.83(C-3), 69.01 (C-4), 78.61(C-5), 62.31(C-6), 22.10( $\text{SO}_2\text{PhCH}_3$ ,  $\text{SO}_2\text{PhCH}_3$ ).

Compound **6**;  $\delta_{\text{H}}$  5.39(1H, d,  $J_{1,2}$  2.7, H-1), 4.25(1H, dd, H-2), 5.64(1H, dd,  $J_{2,3}$  2.9,  $J_{3,4}$  6.2, H-3), 5.44(1H, dd,  $J_{4,5}$  9.7, H-4), 4.11(1H, ddd,  $J_{5,6}$  2.5, H-5), 4.38(1H, dd,  $J_{5,6}$  5.1,  $J_{6,6'}$  12.2, H-6), 4.05(1H, dd, H-6'), 2.48(3H, s,  $\text{SO}_2\text{PhCH}_3$ ), 2.47(3H, s,  $\text{SO}_2\text{PhCH}_3$ ), 2.07(3H, s,  $\text{OCOCH}_3$ ), 2.05(3H, s,  $\text{OCOCH}_3$ ), 1.86(3H, s,  $\text{OCOCH}_3$ );  $\delta_{\text{C}}$  170.37 (OCOMe), 169.44 (OCOMe), 169.21 (OCOMe), 6.26(C-1), 61.31(C-2), 67.43(C-3), 67.65(C-4), 73.50(C-5), 62.27(C-6), 21.77( $\text{SO}_2\text{PhCH}_3$ ), 21.73( $\text{SO}_2\text{PhCH}_3$ ), 20.66( $\text{OCOCH}_3$ ), 20.66( $\text{OCOCH}_3$ ), 20.41( $\text{OCOCH}_3$ ).

Compound **7**;  $\delta_{\text{H}}$  ( $\text{C}_6\text{D}_6$ ) 5.86(1H, d,  $J_{1,2}$  1.6, H-1), 5.46(1H, s,  $\text{CHPh}$ ), 4.67(1H, dd, H-2), 4.72(1H, dd,  $J_{2,3}$  2.9,  $J_{3,4}$  8.3, H-3), 4.62(1H, dd,  $J_{4,5}$  10.2, H-4), 4.21(1H, dt,  $J_{5,6a}$  10.2,  $J_{5,6e}$  5.3, H-5), 3.63(1H, t, H-6a), 4.10(1H, dd,  $J_{6a,6e}$  10.2, H-6e), 1.90(3H, s,  $\text{SO}_2\text{PhCH}_3$ ), 1.86(3H, s,  $\text{SO}_2\text{PhCH}_3$ );  $\delta_{\text{C}}$  ( $\text{C}_6\text{D}_6$ ) 102.01( $\text{CHPh}$ ), 87.29(C-1), 65.91(C-2), 67.32(C-3), 79.31(C-4), 66.88(C-5), 68.92(C-6), 21.21( $\text{SO}_2\text{PhCH}_3$ ), 21.20( $\text{SO}_2\text{PhCH}_3$ ).

Compound **8**;  $\delta_{\text{H}}$  ( $\text{C}_6\text{D}_6$ ) 7.54(1H, s, H-1), 4.59(1H, dd,  $J_{3,4}$  7.3,  $J_{3,\text{OH-3}}$  1.4, H-3), 3.93(1H, d, OH-3), 3.60(1H, dd,  $J_{4,5}$  10.3, H-4) 3.18(1H, dt, H-5), 3.29(1H, t,  $J_{5,6a}$  10.3,

$J_{6a,6e}$  10.5, H-6a), 3.92(1H, dd,  $J_{5,6e}$  5.1, H-6e), 5.22(1H, s, CHPh), 1.98(3H, s, SO<sub>2</sub>PhCH<sub>3</sub>);  $\delta_C$  (C<sub>6</sub>D<sub>6</sub>) 154.54(C-1), 119.53(C-2), 65.90(C-3), 79.38 (C-4), 69.97 (C-5), 67.31(C-6), 101.61(CHPh), 21.10(SO<sub>2</sub>PhCH<sub>3</sub>).

Compound **9**;  $\delta_H$  (C<sub>6</sub>D<sub>6</sub>). 7.87(1H, s, H-1), 6.01(1H, dd,  $J_{3,4}$  3.2,  $J_{3,5}$  0.7, H-3), 5.19(1H, dd,  $J_{4,5}$  2.3, H-4), 4.26(1H, ddd,  $J_{5,6'}$  3.8, H-5), 4.32(1H, dd,  $J_{5,6}$  7.6,  $J_{6,6'}$  11.6, H-6), 3.87(1H, dd, H-6'), 1.88(3H, s, SO<sub>2</sub>PhCH<sub>3</sub>), 1.63(3H, s, OCOCH<sub>3</sub>), 1.50(3H, s, OCOCH<sub>3</sub>), 1.39(3H, s, OCOCH<sub>3</sub>);  $\delta_C$  (C<sub>6</sub>D<sub>6</sub>). 169.54(OCOMe), 168.62(OCOMe), 168.62(OCOMe), 155.28(C-1), 114.79(C-2), 62.01(C-3), 65.96(C-4), 75.45(C-5), 60.64(C-6), 21.02(SO<sub>2</sub>PhCH<sub>3</sub>), 19.96(OCOCH<sub>3</sub>), 19.96(OCOCH<sub>3</sub>), 19.72(OCOCH<sub>3</sub>).

Compound **10**;  $\delta_H$  5.52(1H, d,  $J_{1,2}$  4.5, H-1), 4.29(1H, dd, H-2), 4.59(1H, dd,  $J_{2,3}$  9.7,  $J_{3,4}$  10.7, H-3), 4.32(1H, dd,  $J_{4,5}$  10.5, H-4), 3.99(1H, ddd,  $J_{5,6}$  4.6,  $J_{5,6'}$  2.4, H-5), 3.90(1H, dd,  $J_{6,6'}$  12.6, H-6), 3.80(1H, dd, H-6'), 3.40(3H, s, OCH<sub>3</sub>), 3.22(3H, s, OCH<sub>3</sub>), 2.47(3H, s, SO<sub>2</sub>PhCH<sub>3</sub>), 2.46(3H, s, SO<sub>2</sub>PhCH<sub>3</sub>), 1.75-1.26(8H, m, C<sub>6</sub>H<sub>8</sub>(OMe)<sub>2</sub>);  $\delta_C$  87.11(C-1), 61.79(C-2), 66.01 (C-3), 63.44(C-4), 79.50(C-5), 62.20(C-6), 47.74(OCH<sub>3</sub>), 47.05(OCH<sub>3</sub>), 26.89(C<sub>6</sub>H<sub>8</sub>(OMe)<sub>2</sub>), 26.63(C<sub>6</sub>H<sub>8</sub>(OMe)<sub>2</sub>), 21.74(SO<sub>2</sub>PhCH<sub>3</sub>), 21.70(SO<sub>2</sub>PhCH<sub>3</sub>), 21.33(C<sub>6</sub>H<sub>8</sub>(OMe)<sub>2</sub>), 21.21(C<sub>6</sub>H<sub>8</sub>(OMe)<sub>2</sub>).

Compound **11**;  $\delta_H$  (C<sub>6</sub>D<sub>6</sub>); 5.89(1H, d,  $J_{1,2}$  3.7, H-1), 4.78(1H, dd, H-2), 5.07(1H, dd,  $J_{2,3}$  9.2,  $J_{3,4}$  11.0, H-3), 4.79 (1H, dd,  $J_{4,5}$  10.3, H-4), 44.25(1H, ddd, H-5), 4.91(1H, dd,  $J_{5,6}$  7.6,  $J_{6,6'}$  12.1, H-6), 4.59(1H, dd,  $J_{5,6'}$  2.2, H-6'), 3.44(3H, s, OCH<sub>3</sub>), 2.99(3H, s, OCH<sub>3</sub>), 1.89(3H, s, SO<sub>2</sub>PhCH<sub>3</sub>), 1.85(3H, s, SO<sub>2</sub>PhCH<sub>3</sub>), 1.74(s, 3H, OCOCH<sub>3</sub>), 1.42-1.27 (8H, m, C<sub>6</sub>H<sub>8</sub>(OMe)<sub>2</sub>);  $\delta_C$  (C<sub>6</sub>D<sub>6</sub>) 169.99(OCOMe), 87.96(C-1), 62.37(C-2), 66.38 (C-3), 65.12(C-4), 77.29(C-5), 64.34(C-6), 47.68(OCH<sub>3</sub>), 46.61(OCH<sub>3</sub>), 30.15(C<sub>6</sub>H<sub>8</sub>(OMe)<sub>2</sub>), 29.77(C<sub>6</sub>H<sub>8</sub>(OMe)<sub>2</sub>), 27.13(C<sub>6</sub>H<sub>8</sub>(OMe)<sub>2</sub>), 27.02(C<sub>6</sub>H<sub>8</sub>(OMe)<sub>2</sub>), 21.50(SO<sub>2</sub>PhCH<sub>3</sub>), 21.14(SO<sub>2</sub>PhCH<sub>3</sub>), 20.40(OCOCH<sub>3</sub>).

Compound **12**;  $\delta_H$  (C<sub>6</sub>D<sub>6</sub>); 7.53(1H, d,  $J_{1,3}$  1.4, H-1), 5.12(1H, dd,  $J_{3,4}$  9.2, H-3), 4.11 (1H, dd,  $J_{4,5}$  10.8, H-4), 3.59(1H, ddd, H-5), 4.34(1H, dd,  $J_{5,6}$  2.1,  $J_{6,6'}$  12.2, H-6), 4.08(1H, dd,  $J_{5,6'}$  4.3, H-6'), 3.41(3H, s, OCH<sub>3</sub>), 2.68(3H, s, OCH<sub>3</sub>), 1.91(3H, s, SO<sub>2</sub>PhCH<sub>3</sub>), 1.57(3H, s, OCOCH<sub>3</sub>), 1.40-1.28 (8H, m, C<sub>6</sub>H<sub>8</sub>(OMe)<sub>2</sub>);  $\delta_C$  (C<sub>6</sub>D<sub>6</sub>) 165.68(OCOMe), 153.97(C-1), 117.60(C-2), 65.62(C-3), 65.26(C-4), 76.32 (C-5), 60.97(C-6), 47.07(OCH<sub>3</sub>), 46.07(OCH<sub>3</sub>), 30.16 (C<sub>6</sub>H<sub>8</sub>(OMe)<sub>2</sub>), 28.45(C<sub>6</sub>H<sub>8</sub>(OMe)<sub>2</sub>), 27.08(C<sub>6</sub>H<sub>8</sub>(OMe)<sub>2</sub>), 26.87(C<sub>6</sub>H<sub>8</sub>(OMe)<sub>2</sub>), 21.15(SO<sub>2</sub>PhCH<sub>3</sub>), 20.06(OCOCH<sub>3</sub>).
