# Supplementary material for: Preparation of 2-deoxy-2-C-p-tolylsulfonyl-β-d-glucopyranosyl p-tolyl sulfones having non-chair conformation and their elimination reactions
Source: Royal Society of Chemistry journal article supplement (doi:10.1039/b707802a), 2007-01-01
Supplement: b707802ab.pdf [file b707802ab.pdf]

01/04/14 Acetylation(BF3.Et2O) of Di-TsType CDC13 1H

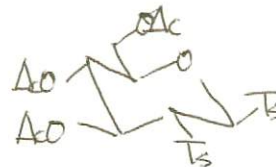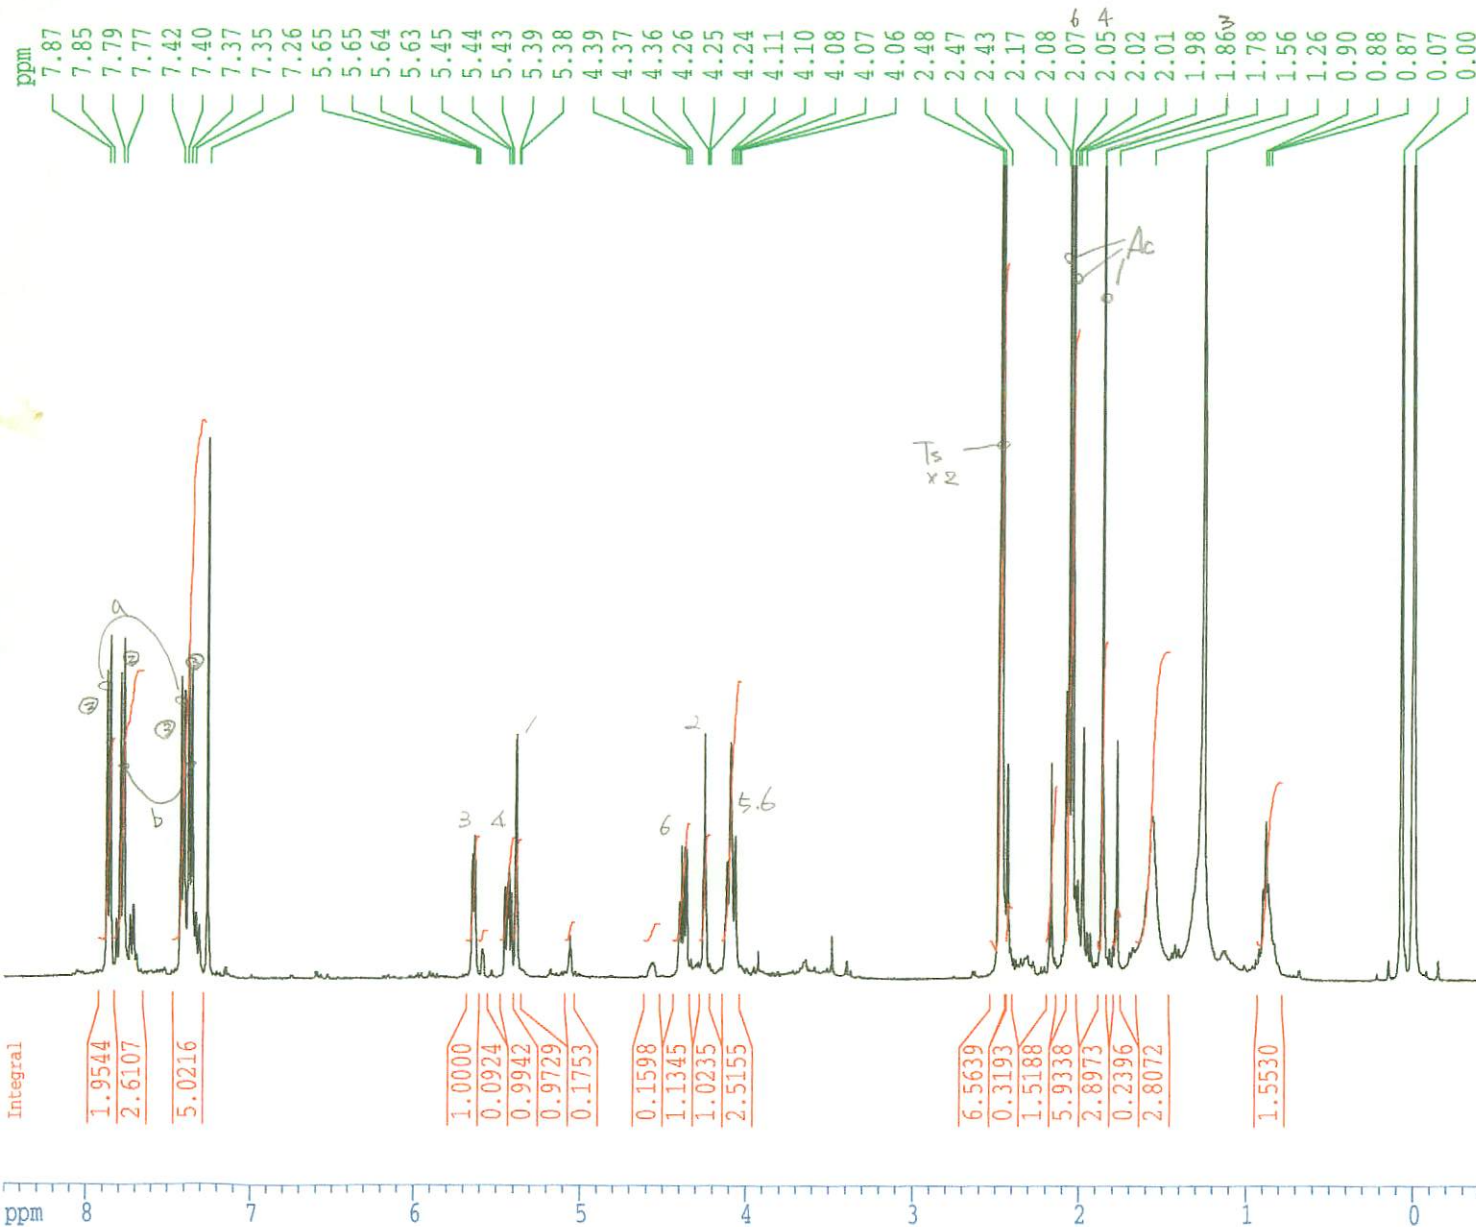

Current Data Parameters  
 NAME TomoS  
 EXPNO 1  
 PROCNO 1

F2 - Acquisition Parameters  
 Date\_ 20010414  
 Time 14.29  
 INSTRUM dpx400  
 PROBHD 5 mm QNP 1H/  
 PULPROG zg  
 TD 32768  
 SOLVENT CDCl3  
 NS 200  
 DS 4  
 SWH 5208.333 Hz  
 FIDRES 0.158946 Hz  
 AQ 3.1457779 sec  
 RG 181  
 DW 96.000 usec  
 DE 6.00 usec  
 TE 300.0 K  
 D1 1.00000000 sec

===== CHANNEL f1 =====  
 NUC1 1H  
 P1 13.00 usec  
 PL1 -3.00 dB  
 SFO1 400.1322007 MHz

F2 - Processing parameters  
 SI 32768  
 SF 400.1300092 MHz  
 WDW EM  
 SSB 0  
 LB 0.20 Hz  
 GB 0  
 PC 1.00

1D NMR plot parameters  
 CX 20.00 cm  
 F1P 8.500 ppm  
 F1 3401.10 Hz  
 F2P -0.500 ppm  
 F2 -200.07 Hz  
 PPMCM 0.45000 ppm/cm  
 HZCM 180.05850 Hz/cm

1/04/14 Acetylation(BF3.Et2O) of Di-TsType CDCl3 COSY

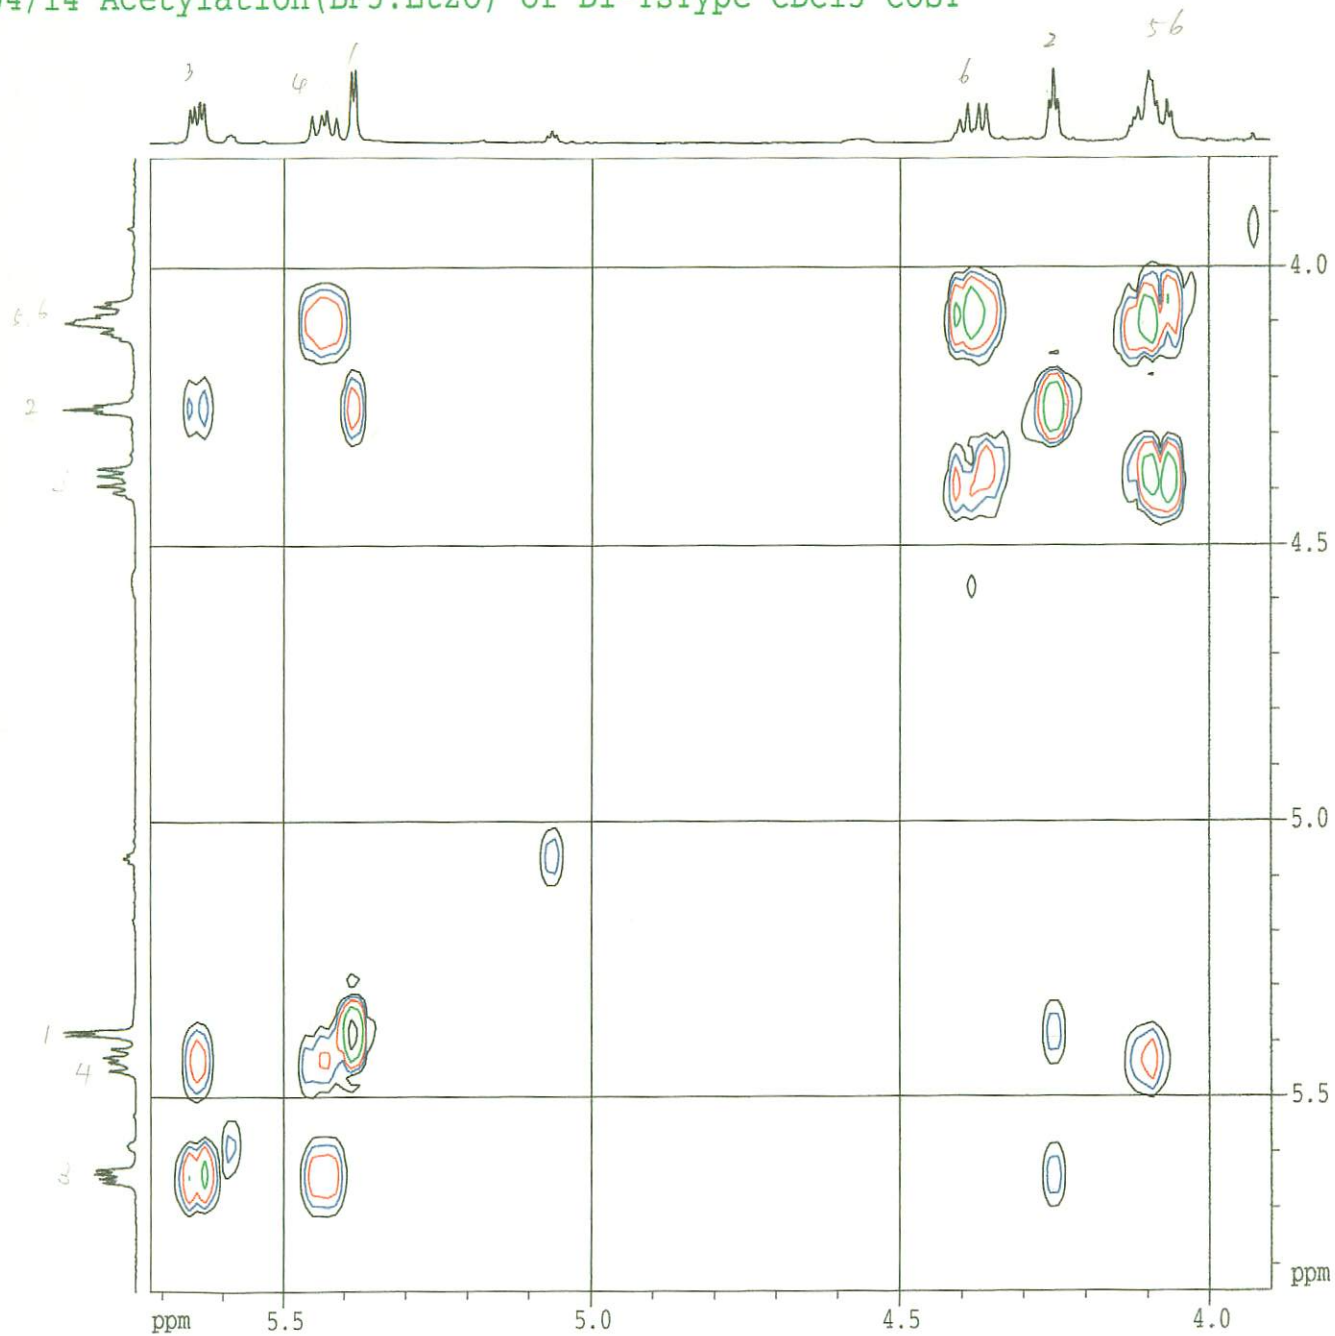

```
Current Data Parameters
NAME      Tomo3
EXPNO    2
PROCNO   1

F2 - Acquisition Parameters
Date_    20010414
Time     14.42
INSTRUM  dpx400
PROBHD   5 mm QNP 1H/
PULPROG  cosygs
TD       2048
SOLVENT  DMSO
NS       24
DS       8
SMH      5208.333 Hz
FIDRES   2.543132 Hz
AQ       0.1966580 sec
RG       1024
DW       96.000 usec
DE       6.00 usec
TE       300.0 K
DQ       0.00003300 sec
D1       1.00000000 sec
D13      0.00003300 sec
D16      0.00010000 sec
IN0      0.00019200 sec

===== CHANNEL f1 =====
NUC1     1H
PQ       10.50 usec
P1       13.00 usec
PL1      -3.00 dB
SFO1     400.1322007 MHz

===== GRADIENT CHANNEL =====
P16      1000.00 usec

F1 - Acquisition parameters
ND0      1
TD       256
SFO1     400.1322 MHz
FIDRES   20.345053 Hz
SW       13.017 ppm

F2 - Processing parameters
SI       1024
SF       400.1300090 MHz
WDW      SINE
SSB      0
LB       0.00 Hz
GB       0
PC       1.00

F1 - Processing parameters
SI       1024
MC2      OF
SF       400.1300090 MHz
WDW      SINE
SSB      0
LB       0.00 Hz
GB       0

2D NMR plot parameters
CX2      15.00 cm
CX1      15.00 cm
F2PLO    5.719 ppm
F2LO     2288.33 Hz
F2PHI    3.901 ppm
F2HI     1561.00 Hz
F1PLO    5.846 ppm
F1LO     2339.19 Hz
F1PHI    3.800 ppm
F1HI     1520.30 Hz
F2PFCM   0.12118 ppm/cm
F2HCM    48.48904 Hz/cm
F1PFCM   0.13644 ppm/cm
F1HCM    54.59256 Hz/cm
```

01/04/14 Acetylation(BF3.Et2O) of Di-TsType CDC13 13C

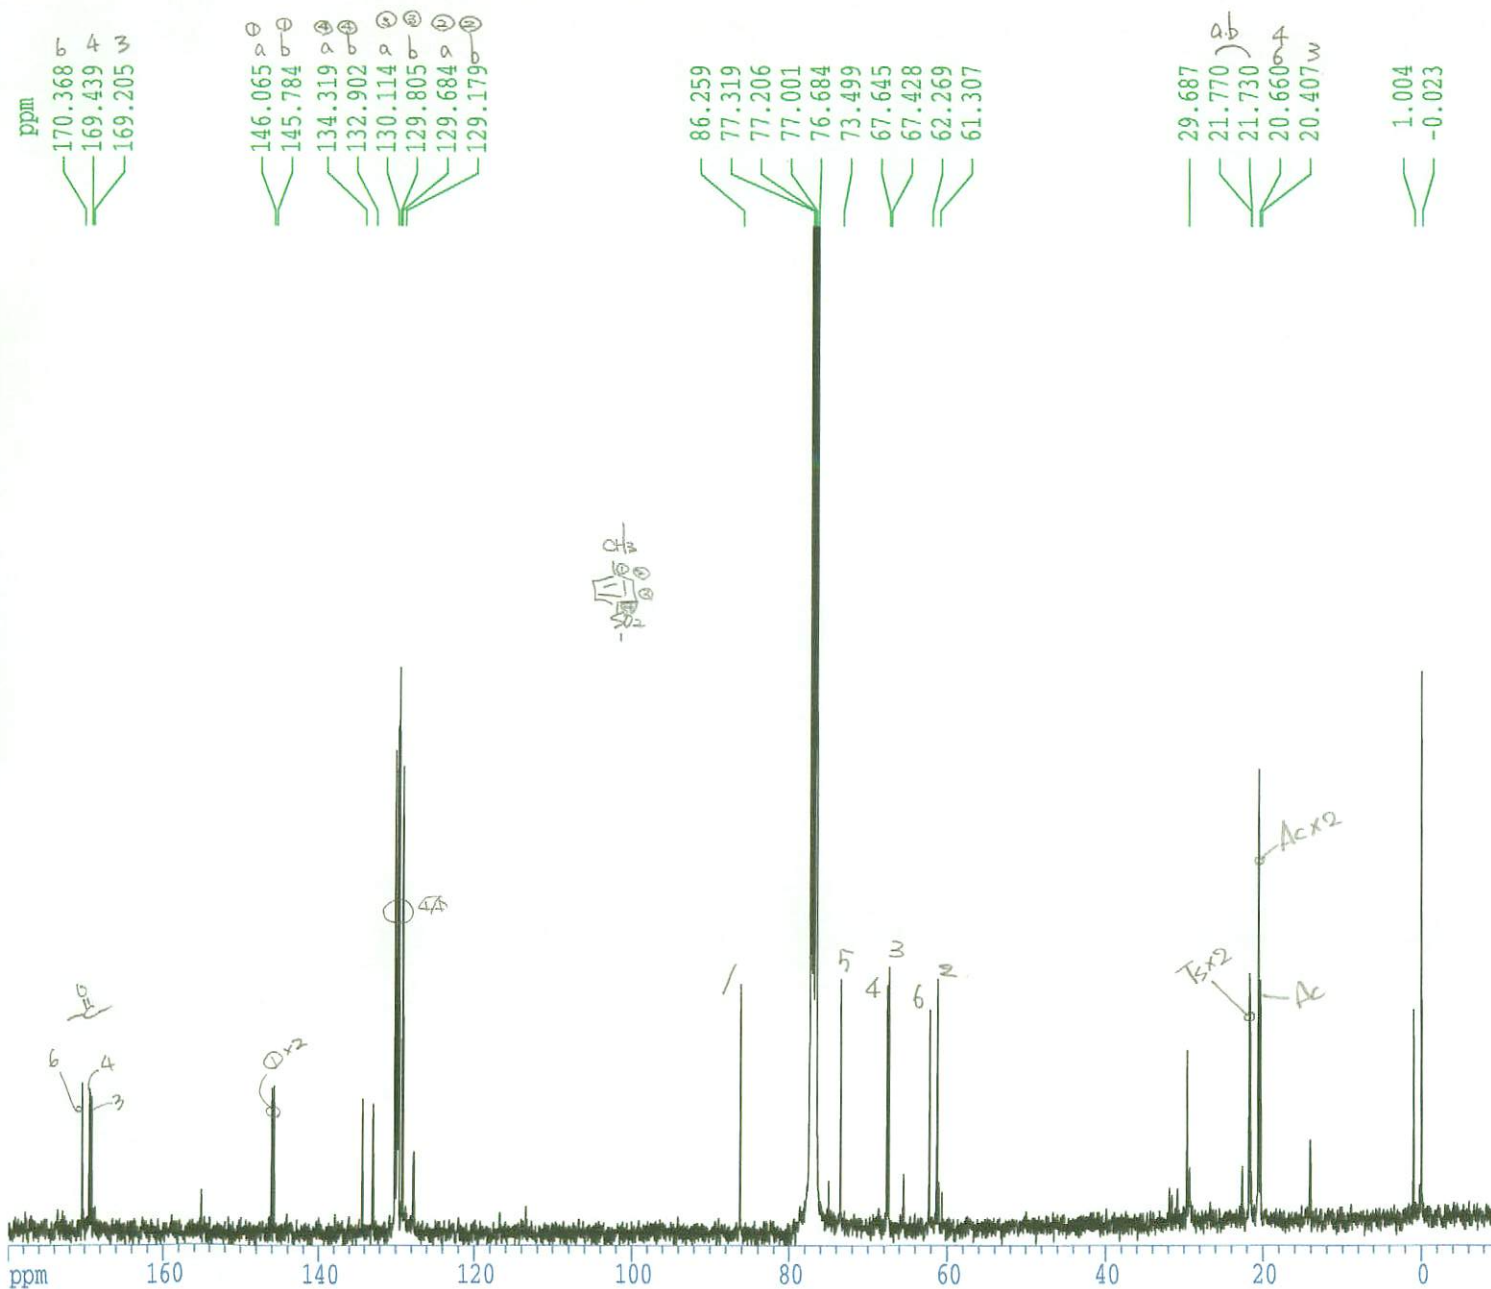

Current Data Parameters  
 NAME TomoS  
 EXPNO 7  
 PROCNO 1

F2 - Acquisition Parameters  
 Date\_ 20010416  
 Time 9.34  
 INSTRUM dpx400  
 PROBHD 5 mm QNP 1H/  
 PULPROG zgpg30  
 TD 65536  
 SOLVENT CDC13  
 NS 20000  
 DS 4  
 SWH 26178.010 Hz  
 FIDRES 0.399445 Hz  
 AQ 1.2517875 sec  
 RG 4597.6  
 DW 19.100 usec  
 DE 6.00 usec  
 TE 300.0 K  
 D1 1.50000000 sec  
 D11 0.03000000 sec  
 D12 0.00002000 sec

===== CHANNEL f1 =====  
 NUC1 13C  
 P1 9.00 usec  
 PL1 -2.00 dB  
 SFO1 100.6237964 MHz

===== CHANNEL f2 =====  
 CPDPRG2 waltz16  
 NUC2 1H  
 PCPD2 100.00 usec  
 PL2 120.00 dB  
 PL12 17.00 dB  
 PL13 17.00 dB  
 SFO2 400.1316005 MHz

F2 - Processing parameters  
 SI 65536  
 SF 100.6127690 MHz  
 WDW EM  
 SSB 0  
 LB 2.00 Hz  
 GB 0  
 PC 1.40

1D NMR plot parameters  
 CX 20.00 cm  
 F1P 180.000 ppm  
 F1 18110.30 Hz  
 F2P -10.000 ppm  
 F2 -1006.13 Hz  
 PPMCM 9.50000 ppm/cm  
 HZCM 955.82129 Hz/cm

01/04/14 Acetylation(BF3.Et2O) of Di-TsType CDCl3 HMQC

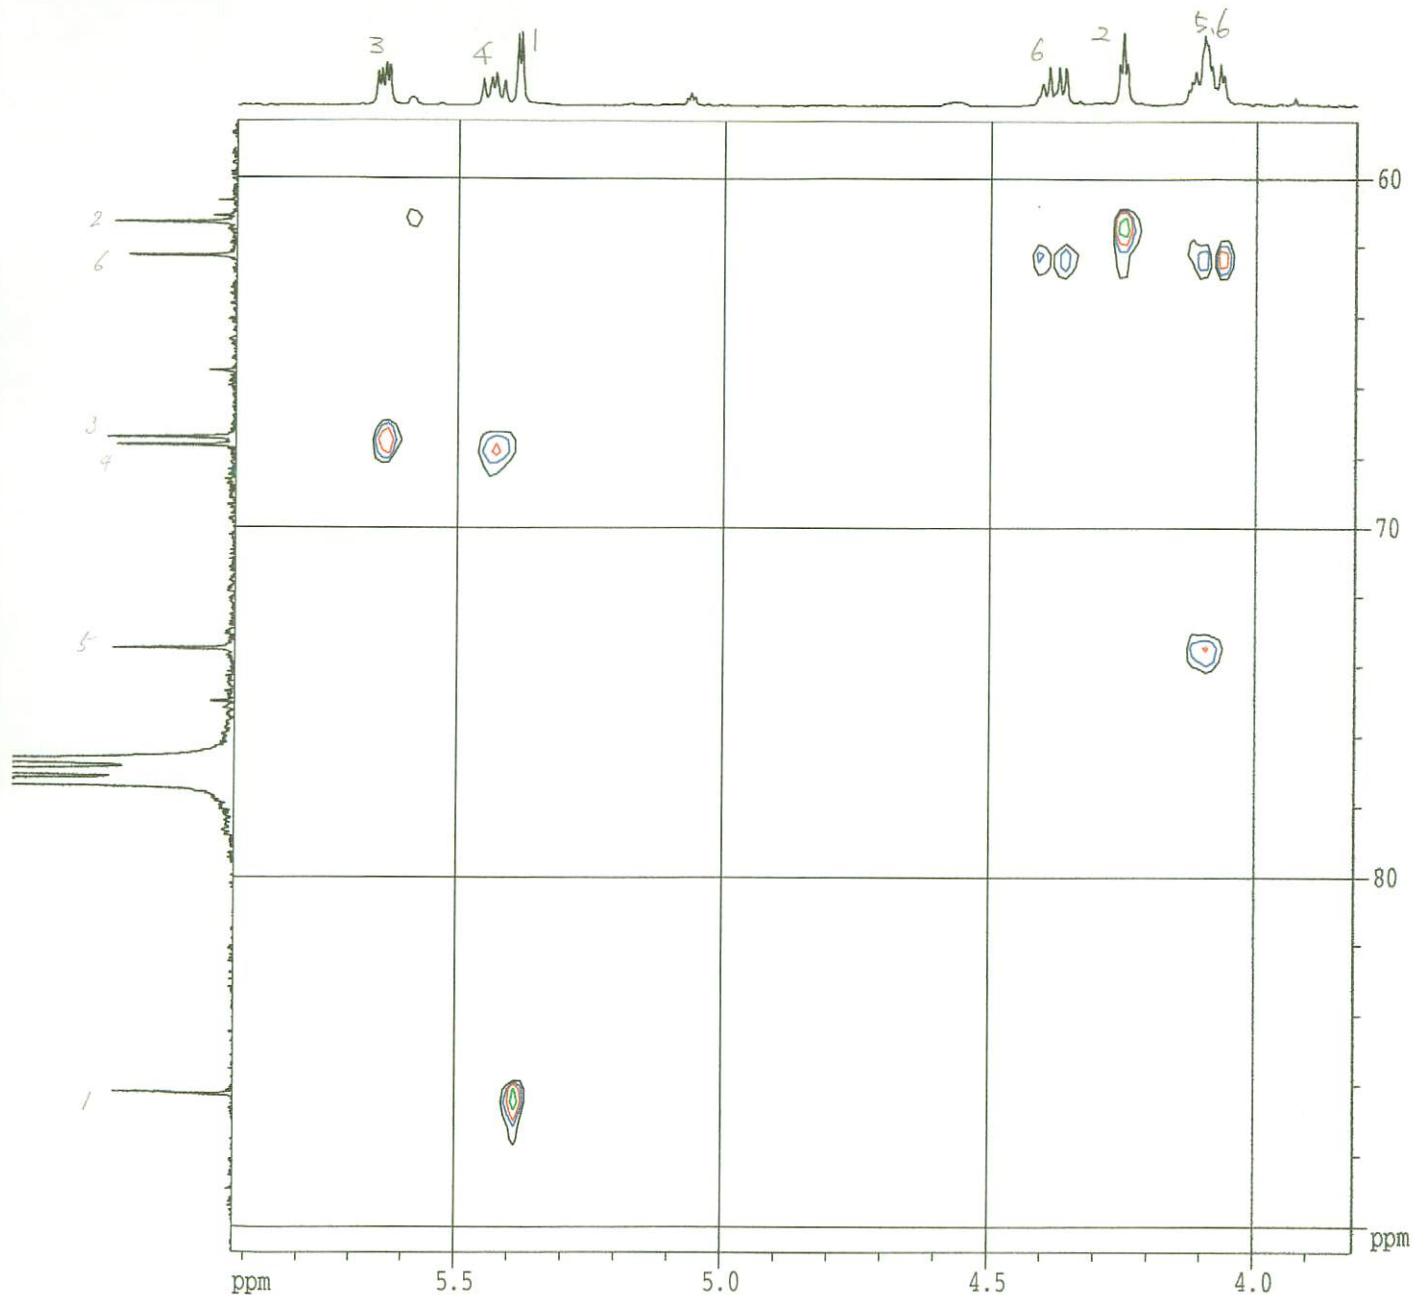

```
Current Data Parameters
NAME      TomcoS
EXPNO    3
PROCNO   1

F2 - Acquisition Parameters
Date_    20010414
Time     16.49
INSTRUM  dpx400
PROBHD   5 mm QNP 1H/
PULPROG  inv4gptp
TD       2048
SOLVENT  DMSO
NS       24
DS       16
SMH      5708.313 Hz
FIDRES   2.541132 Hz
AQ       0.1966580 sec
RG       16384
DM       96.000 usec
DE       6.00 usec
TE       300.0 K
D0       0.00800000 sec
D1       2.00000000 sec
D2       0.00345000 sec
d4       0.00172500 sec
D11      0.03000000 sec
D13      0.00000000 sec
D16      0.00010000 sec
d20      0.00062500 sec
d21      0.00234000 sec
INO      0.00001380 sec

===== CHANNEL f1 =====
NUC1     1H
P1       13.00 usec
P2       26.00 usec
PL1      -3.00 dB
SFO1     400.1322007 MHz

===== CHANNEL f2 =====
CPOPRG2  waltz16
NUC2     13C
P3       8.80 usec
P4       26.00 usec
PCPD2    70.00 usec
PL2      -2.00 dB
PL12     15.70 dB
SFO2     100.6197719 MHz

===== GRADIENT CHANNEL =====
P16      1000.00 usec

F1 - Acquisition parameters
ND0      4
TD       512
SFO1     100.6198 MHz
FIDRES   35.382698 Hz
SN       180.044 ppm

F2 - Processing parameters
SI       1024
SF       400.1300090 MHz
WDW      QSDWE
SSB      2
LB       0.00 Hz
GB       0
PC       1.40

F1 - Processing parameters
SI       512
MC2      TPP1
SF       100.6127690 MHz
WDW      QSDWE
SSB      2
LB       0.00 Hz
GB       0

2D NMR plot parameters
CX2      15.00 cm
CX1      15.00 cm
F2PLO    5.922 ppm
F2F0     2369.71 Hz
F2FH1    3.812 ppm
F2FH1     1525.39 Hz
F1PLO    90.703 ppm
F1F0     9125.88 Hz
F1FH1    58.349 ppm
F1FH1     5870.67 Hz
F2FPMCH  0.14067 ppm/cm
F2FHCH   56.28798 Hz/cm
F1FPMCH  2.15682 ppm/cm
F1FHCH   217.01389 Hz/cm
```

01/04/14 Acetylation(BF<sub>3</sub>.Et<sub>2</sub>O) of Di-TsType CDCl<sub>3</sub> HMBC

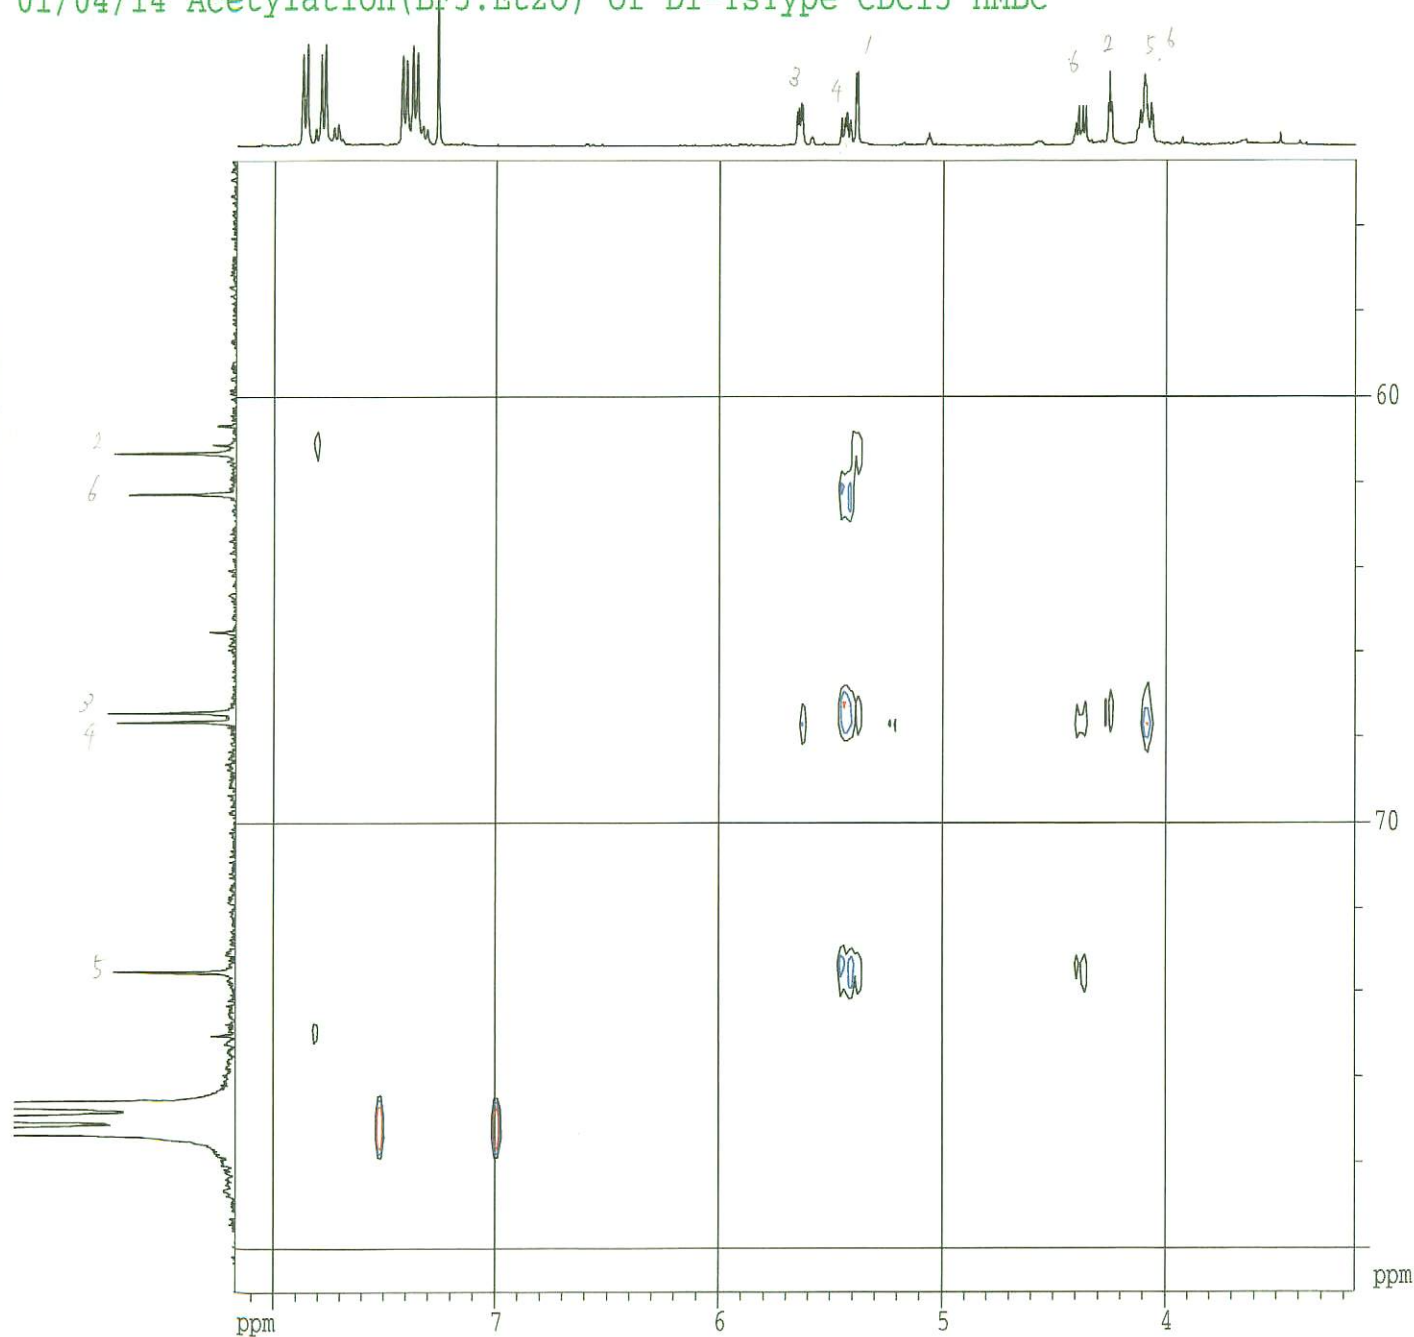

Current Data Parameters

|        |       |
|--------|-------|
| NAME   | TomoS |
| EXPNO  | 4     |
| PROCNO | 1     |

F2 - Acquisition Parameters

|         |                |
|---------|----------------|
| Date_   | 20010415       |
| Time    | 0.24           |
| INSTRUM | cpX400         |
| PROBHD  | 5 mm QNP 1H/   |
| PULPROG | inv4gs12ind    |
| TD      | 2048           |
| SOLVENT | DMSO           |
| NS      | 24             |
| DS      | 16             |
| SWH     | 5208.333 Hz    |
| FIDRES  | 2.543132 Hz    |
| AQ      | 0.1966580 sec  |
| RG      | 16384          |
| DW      | 96.000 usec    |
| DE      | 6.00 usec      |
| TE      | 300.0 K        |
| DO      | 0.00000300 sec |
| D1      | 2.00000000 sec |
| D2      | 0.00345000 sec |
| D6      | 0.06500000 sec |
| D13     | 0.00000300 sec |
| D16     | 0.00010000 sec |
| TD0     | 0.00001900 sec |

----- CHANNEL f1 -----

|      |                 |
|------|-----------------|
| NUC1 | 1H              |
| P1   | 13.00 usec      |
| P2   | 26.00 usec      |
| PL1  | -3.00 dB        |
| SFO1 | 400.1322007 MHz |

----- CHANNEL f2 -----

|      |                 |
|------|-----------------|
| NUC2 | 13C             |
| P3   | 8.80 usec       |
| PL2  | -2.00 dB        |
| SFO2 | 100.6237964 MHz |

----- GRADIENT CHANNEL -----

|     |              |
|-----|--------------|
| P16 | 1000.00 usec |
|-----|--------------|

F1 - Acquisition parameters

|        |              |
|--------|--------------|
| ND0    | 2            |
| TD     | 512          |
| SFO1   | 100.6238 MHz |
| FIDRES | 51.398026 Hz |
| SW     | 261.527 ppm  |

F2 - Processing parameters

|     |                 |
|-----|-----------------|
| SI  | 1024            |
| SP  | 400.1300090 MHz |
| WDW | SINE            |
| SSB | 0               |
| LB  | 0.00 Hz         |
| GB  | 0               |
| RC  | 1.40            |

F1 - Processing parameters

|     |                 |
|-----|-----------------|
| SI  | 512             |
| MC2 | QF              |
| SP  | 100.6127690 MHz |
| WDW | SINE            |
| SSB | 0               |
| LB  | 0.00 Hz         |
| GB  | 0               |

2D NMR plot parameters

|        |                 |
|--------|-----------------|
| CK2    | 15.00 cm        |
| CK1    | 15.00 cm        |
| F2PLO  | 8.172 ppm       |
| F2L0   | 3269.98 Hz      |
| F2PHI  | 3.151 ppm       |
| F2HI   | 1260.91 Hz      |
| F1PLO  | 80.995 ppm      |
| F1L0   | 8149.13 Hz      |
| F1PHI  | 54.431 ppm      |
| F1HI   | 5476.44 Hz      |
| F2FMCM | 0.33474 ppm/cm  |
| F2H2CM | 133.93826 Hz/cm |
| F1FMCM | 1.77095 ppm/cm  |
| F1H2CM | 178.17984 Hz/cm |

01/04/14 Acetylation(BF<sub>3</sub>.Et<sub>2</sub>O) of Di-TsType CDC13 NOESY

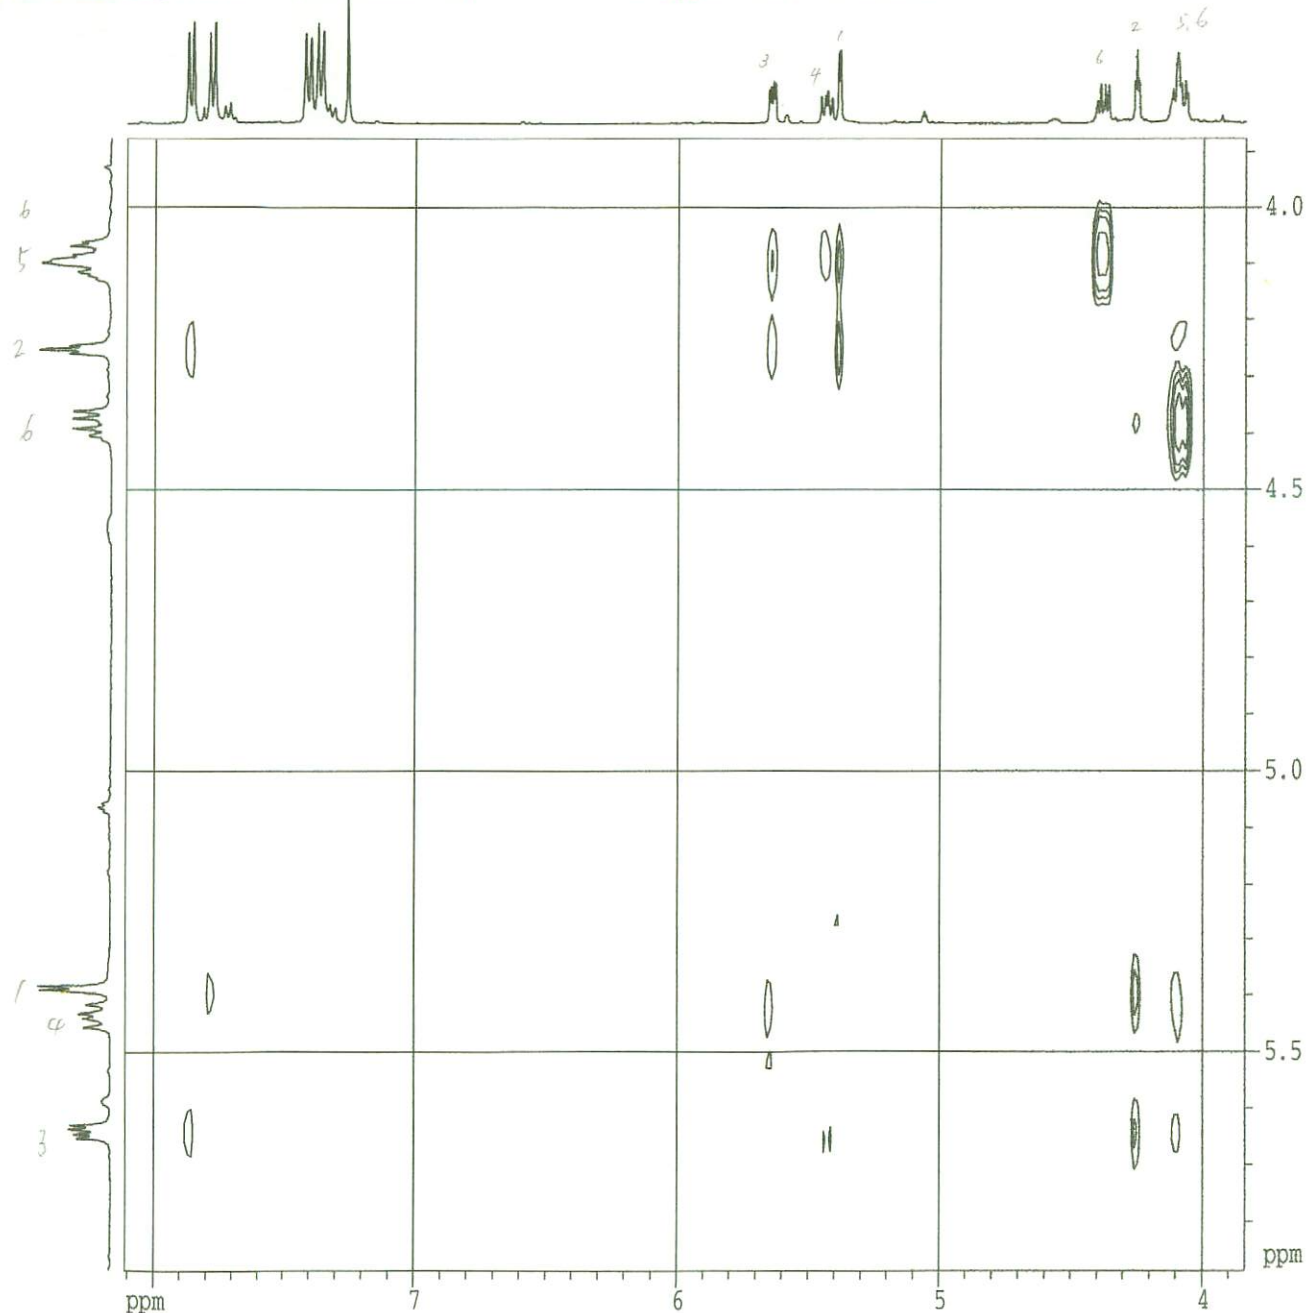

Current Data Parameters  
 NAME TomoS  
 EXPNO 5  
 PROCNO 1

F2 - Acquisition Parameters  
 Date\_ 20010415  
 Time 8.12  
 INSTRUM dpx400  
 PROBHD 5 mm QNP 1H/  
 PULPROG noesytp  
 TD 2048  
 SOLVENT DMSO  
 NS 24  
 DS 8  
 SWH 5208.333 Hz  
 FIDRES 2.543132 Hz  
 AQ 0.1966580 sec  
 RG 406.4  
 DW 96.000 usec  
 DE 6.00 usec  
 TE 300.0 K  
 D0 0.00000300 sec  
 D1 1.00000000 sec  
 D8 1.00000000 sec  
 IN0 0.00009600 sec

===== CHANNEL f1 =====  
 NUC1 1H  
 P1 13.00 usec  
 PL1 -3.00 dB  
 SFO1 400.1322007 MHz

F1 - Acquisition parameters  
 ND0 2  
 TD 256  
 SFO1 400.1322 MHz  
 FIDRES 20.345053 Hz  
 SW 13.017 ppm

F2 - Processing parameters  
 SI 1024  
 SF 400.1300090 MHz  
 WDW QSINE  
 SSB 2  
 LB 0.00 Hz  
 GB 0  
 PC 1.40

F1 - Processing parameters  
 SI 512  
 MC2 TPPI  
 SF 400.1300090 MHz  
 WDW QSINE  
 SSB 2  
 LB 0.00 Hz  
 GB 0

2D NMR plot parameters  
 CX2 15.00 cm  
 CX1 15.00 cm  
 F2PLO 8.109 ppm  
 F2LO 3244.55 Hz  
 F2PHI 3.838 ppm  
 F2HI 1535.56 Hz  
 F1PLO 5.884 ppm  
 F1LO 2354.45 Hz  
 F1PHI 3.876 ppm  
 F1HI 1550.82 Hz  
 F2PPMCM 0.28474 ppm/cm  
 F2HZCM 113.93230 Hz/cm  
 F1PPMCM 0.13389 ppm/cm  
 F1HZCM 53.57531 Hz/cm
